# Supplementary material for: The effect of surface coverage on N2, NO and N2O formation over Pt(111)
Source: Royal Society of Chemistry journal article supplement (doi:10.1039/c8cp04066d), 2018-01-01
Supplement: c8cp04066d1.pdf [file c8cp04066d1.pdf]

# The effect of the surface coverage on N<sub>2</sub>, NO and N<sub>2</sub>O formation over Pt(111)

*Juan D. Gonzalez<sup>a,b</sup>, Kambiz Shojaee<sup>a</sup>, Brian S. Haynes<sup>a</sup>, and Alejandro Montoya<sup>a\*</sup>*

<sup>a</sup>The University of Sydney, Faculty of Engineering and Information Technologies, School of Chemical and Biomolecular Engineering, NSW 2006 Australia.

<sup>b</sup> Corporación Universitaria Remington (Uniremington), Calle 51 No. 51-27, Medellín, Colombia.

**Supplementary material:** This supplementary material provides the configurations of the double-species adsorption configurations that were calculated in this study, providing the energy difference between the most stable configurations presented in the main manuscript and those configurations that were found less energetically preferred (Figures S1 to Figure S5). In addition, we present the configuration of the transition states of all reaction paths together with the imaginary frequencies as a function of the surface coverage (Figures S6 to Figures S9).

**Figure S1.** Configurations of the double-species co-adsorption at 0.06 and 0.125 ML. Configurations with a  $\Delta E = 0$  corresponds to the most stable configuration, presented in Figure 2 of the main manuscript. Configurations with a  $\Delta E$  different to zero correspond to less stable co-adsorption. The energy difference with the most stable configuration is reported as  $\Delta E$  in  $\text{kJ mol}^{-1}$ . The colour coding corresponds to Blue: nitrogen atom, Red: oxygen atom and Gray: platinum atom.

| Configurations | $\text{O}^*-(\text{N}^*)$                                                                              | $\text{N}^*-(\text{O}^*)$                                                                              | $\text{N}^*-(\text{NO}^*)$                                                                           | $\text{O}^*-(\text{NO}^*)$                                                                            | $\text{NO}^*-(\text{O}^*)$                                                                            | $\text{NO}^*-(\text{N}^*)$                                                                            | $\theta$ |
|----------------|--------------------------------------------------------------------------------------------------------|--------------------------------------------------------------------------------------------------------|------------------------------------------------------------------------------------------------------|-------------------------------------------------------------------------------------------------------|-------------------------------------------------------------------------------------------------------|-------------------------------------------------------------------------------------------------------|----------|
| Conf1          | 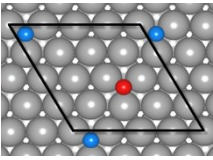<br>$\Delta E = 0$    | <br>$\Delta E = 0$    | <br>$\Delta E = 0$ | <br>$\Delta E = 0$ | <br>$\Delta E = 0$ | <br>$\Delta E = 0$ | 0.06 ML  |
| Conf1          | <br>$\Delta E = 0$    | <br>$\Delta E = 0$    | <br>$\Delta E = 0$ | <br>$\Delta E = 0$ | <br>$\Delta E = 0$ | <br>$\Delta E = 0$ | 0.125 ML |
| Conf2          | <br>$\Delta E = 21$ | <br>$\Delta E = 15$ | ---                                                                                                  | ---                                                                                                   | ---                                                                                                   | ---                                                                                                   |          |

**Figure S2.** Configurations of the double-species co-adsorption at 0.25 ML. Configurations with a  $\Delta E = 0$  corresponds to the most stable configuration, presented in Figure 2 of the main manuscript. Configurations with a  $\Delta E$  different to zero correspond to a less stable co-adsorption. The energy difference with the most stable configuration is reported as  $\Delta E$  in  $\text{kJ mol}^{-1}$ .

| Configurations | $\text{O}^*-(\text{N}^*)$                                                                           | $\text{N}^*-(\text{O}^*)$                                                                           | $\text{N}^*-(\text{NO}^*)$                                                                              | $\text{O}^*-(\text{NO}^*)$                                                                            | $\text{NO}^*-(\text{O}^*)$                                                                            | $\text{NO}^*-(\text{N}^*)$                                                                             | $\theta$ |
|----------------|-----------------------------------------------------------------------------------------------------|-----------------------------------------------------------------------------------------------------|---------------------------------------------------------------------------------------------------------|-------------------------------------------------------------------------------------------------------|-------------------------------------------------------------------------------------------------------|--------------------------------------------------------------------------------------------------------|----------|
| Conf1          | 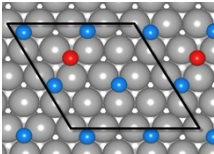<br>$\Delta E = 0$ | <br>$\Delta E = 0$ | <br>$\Delta E = 0$    | <br>$\Delta E = 0$ | <br>$\Delta E = 0$ | <br>$\Delta E = 0$  | 0.25 ML  |
| Conf2          | ---                                                                                                 | ---                                                                                                 | <br>$\Delta E = 43$   | ---                                                                                                   |                                                                                                       | <br>$\Delta E = 11$ |          |
| Conf3          | ---                                                                                                 | ---                                                                                                 | <br>$\Delta E = 45$ | ---                                                                                                   |                                                                                                       |                                                                                                        |          |
|                | ---                                                                                                 | ---                                                                                                 |                                                                                                         | ---                                                                                                   |                                                                                                       |                                                                                                        |          |



**Figure S3.** Configurations of the double-species co-adsorption at 0.375 ML. Configurations with a  $\Delta E = 0$  corresponds to the most stable configuration, presented in Figure 2 of the main manuscript. Configurations with a  $\Delta E$  different to zero correspond to a less stable co-adsorption. The energy difference with the most stable configuration is reported as  $\Delta E$  in  $\text{kJ mol}^{-1}$ .

| Configurations | $\text{O}^*-(\text{N}^*)$                                                                           | $\text{N}^*-(\text{O}^*)$                                                                           | $\text{N}^*-(\text{NO}^*)$                                                                              | $\text{O}^*-(\text{NO}^*)$                                                                            | $\text{NO}^*-(\text{O}^*)$                                                                            | $\text{NO}^*-(\text{N}^*)$                                                                             | $\theta$ |
|----------------|-----------------------------------------------------------------------------------------------------|-----------------------------------------------------------------------------------------------------|---------------------------------------------------------------------------------------------------------|-------------------------------------------------------------------------------------------------------|-------------------------------------------------------------------------------------------------------|--------------------------------------------------------------------------------------------------------|----------|
| Conf1          | 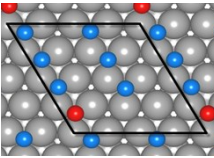<br>$\Delta E = 0$ | <br>$\Delta E = 0$ | <br>$\Delta E = 0$    | <br>$\Delta E = 0$ | <br>$\Delta E = 0$ | <br>$\Delta E = 0$  | 0.375 ML |
| Conf2          | ---                                                                                                 | ---                                                                                                 | <br>$\Delta E = 29$   | ---                                                                                                   |                                                                                                       | <br>$\Delta E = 36$ |          |
| Conf3          | ---                                                                                                 | ---                                                                                                 | <br>$\Delta E = 78$  | ---                                                                                                   |                                                                                                       |                                                                                                        |          |
| Conf4          | ---                                                                                                 | ---                                                                                                 | <br>$\Delta E = 79$ | ---                                                                                                   |                                                                                                       |                                                                                                        |          |
|                | ---                                                                                                 | ---                                                                                                 |                                                                                                         | ---                                                                                                   |                                                                                                       |                                                                                                        |          |

**Figure S4.** Configurations of the double-species co-adsorption at 0.44 ML. Configurations with a  $\Delta E = 0$  corresponds to the most stable configuration, presented in Figure 2 of the main manuscript. Configurations with a  $\Delta E$  different to zero correspond to a less stable co-adsorption. The energy difference with the most stable configuration is reported as  $\Delta E$  in  $\text{kJ mol}^{-1}$ .

| Configurations | $\text{O}^*-(\text{N}^*)$                                                                           | $\text{N}^*-(\text{O}^*)$                                                                           | $\text{N}^*-(\text{NO}^*)$                                                                              | $\text{O}^*-(\text{NO}^*)$                                                                            | $\text{NO}^*-(\text{O}^*)$                                                                            | $\text{NO}^*-(\text{N}^*)$                                                                             | $\theta$ |
|----------------|-----------------------------------------------------------------------------------------------------|-----------------------------------------------------------------------------------------------------|---------------------------------------------------------------------------------------------------------|-------------------------------------------------------------------------------------------------------|-------------------------------------------------------------------------------------------------------|--------------------------------------------------------------------------------------------------------|----------|
| Conf1          | 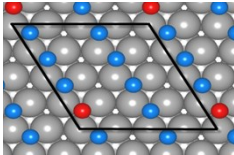<br>$\Delta E = 0$ | <br>$\Delta E = 0$ | <br>$\Delta E = 0$    | <br>$\Delta E = 0$ | <br>$\Delta E = 0$ | <br>$\Delta E = 0$  | 0.44 ML  |
| Conf2          | ---                                                                                                 | ---                                                                                                 | <br>$\Delta E = 12$   | ---                                                                                                   | ---                                                                                                   | <br>$\Delta E = 31$ |          |
| Conf3          | ---                                                                                                 | ---                                                                                                 | <br>$\Delta E = 52$  | ---                                                                                                   | ---                                                                                                   |                                                                                                        |          |
| Conf4          | ---                                                                                                 | ---                                                                                                 | <br>$\Delta E = 54$ | ---                                                                                                   | ---                                                                                                   |                                                                                                        |          |

**Figure S5.** Configurations of the double-species co-adsorption at 0.44 ML. Configurations with a  $\Delta E = 0$  corresponds to the most stable configuration, presented in Figure 2 of the main manuscript. Configurations with a  $\Delta E$  different to zero correspond to a less stable co-adsorption. The energy difference with the most stable configuration is reported as  $\Delta E$  in  $\text{kJ mol}^{-1}$ .

| Configuration<br>s | O <sup>*</sup> –(N <sup>*</sup> )                                                                   | N <sup>*</sup> –(O <sup>*</sup> )                                                                   | N <sup>*</sup> –(NO <sup>*</sup> )                                                                      | O <sup>*</sup> –(NO <sup>*</sup> )                                                                    | NO <sup>*</sup> –(O <sup>*</sup> )                                                                    | NO <sup>*</sup> –(N <sup>*</sup> )                                                                      | $\theta$ |
|--------------------|-----------------------------------------------------------------------------------------------------|-----------------------------------------------------------------------------------------------------|---------------------------------------------------------------------------------------------------------|-------------------------------------------------------------------------------------------------------|-------------------------------------------------------------------------------------------------------|---------------------------------------------------------------------------------------------------------|----------|
| Conf1              | 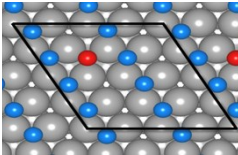<br>$\Delta E = 0$ | <br>$\Delta E = 0$ | <br>$\Delta E = 0$    | <br>$\Delta E = 0$ | <br>$\Delta E = 0$ | <br>$\Delta E = 0$   |          |
| Conf2              | ---                                                                                                 | ---                                                                                                 | <br>$\Delta E = 43$  | ---                                                                                                   |                                                                                                       | <br>$\Delta E = 11$ | 0.5 ML   |
| Conf3              | ---                                                                                                 | ---                                                                                                 | <br>$\Delta E = 45$ | ---                                                                                                   |                                                                                                       |                                                                                                         |          |



**Figure S6.** Schematic representation of the transition states with their respective imaginary frequencies for NO formation at 0.06, 0.125, 0.25, 0.31 and 0.5 ML  $\theta_{o^*}$ .  $\Delta E_a$  (in kJ mol<sup>-1</sup>) is referenced to the most stable initial configuration. Gray: platinum atom blue: nitrogen atom and red: oxygen atom. Bond distances are in Å.

| TS                                                                                                        | Frequency (cm <sup>-1</sup> ) | $\theta_{o^*}$ |
|-----------------------------------------------------------------------------------------------------------|-------------------------------|----------------|
| 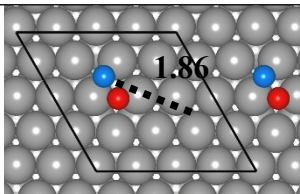<br>$\Delta E_a = 223$   | 401 <i>i</i>                  | 0.06 ML        |
| <br>$\Delta E_a = 222$   | 418 <i>i</i>                  | 0.125 ML       |
| <br>$\Delta E_a = 182$  | 448 <i>i</i>                  | 0.25 ML        |
| <br>$\Delta E_a = 172$ | 448 <i>i</i>                  | 0.31 ML        |
| <br>$\Delta E_a = 120$ | 526 <i>i</i>                  | 0.5 ML         |



**Figure S7.** Schematic representation of the transition states with their respective imaginary frequencies for N<sub>2</sub>(g) formation at 0.125, 0.19, 0.25, 0.38 and 0.5 ML  $\theta_{N^*}$ .  $\Delta E_a$  (in kJ mol<sup>-1</sup>) is referenced to the most stable initial configuration. Gray: platinum atom blue: nitrogen atom and red: oxygen atom. Bond distances are in Å.

| TS                                                                                                        | Frequency (cm <sup>-1</sup> ) | $\theta_{O^*}$ |
|-----------------------------------------------------------------------------------------------------------|-------------------------------|----------------|
| 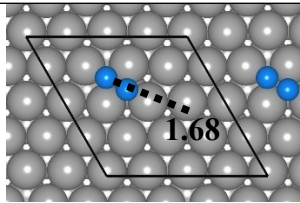<br>$\Delta E_a = 254$   | 634 <i>i</i>                  | 0.125 ML       |
| <br>$\Delta E_a = 225$   | 476 <i>i</i>                  | 0.19 ML        |
| <br>$\Delta E_a = 224$  | 459 <i>i</i>                  | 0.25 ML        |
| <br>$\Delta E_a = 155$ | 448 <i>i</i>                  | 0.375 ML       |
| <br>$\Delta E_a = 113$ | 523 <i>i</i>                  | 0.5 ML         |

**Figure S8.** Schematic representation of the transition states with their respective imaginary frequencies for  $\text{N}_2\text{O}(\text{g})$  formation at 0.06, 0.125, 0.25, 0.31 and 0.5 ML  $\theta_{\text{N}^*}$ .  $\Delta E_{\text{a}}$  (in  $\text{kJ mol}^{-1}$ ) is referenced to the most stable initial configuration. Gray: platinum atom blue: nitrogen atom and red: oxygen atom. Bond distances are in Å.

| TS                                                                                                                 | Frequency ( $\text{cm}^{-1}$ ) | $\theta_{\text{O}^*}$ |
|--------------------------------------------------------------------------------------------------------------------|--------------------------------|-----------------------|
| 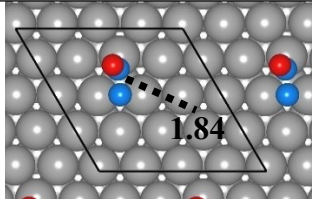<br>$\Delta E_{\text{a}} = 179$   | 273i                           | 0.06 ML               |
| <br>$\Delta E_{\text{a}} = 168$  | 330i                           | 0.19 ML               |
| <br>$\Delta E_{\text{a}} = 125$ | 166i                           | 0.25 ML               |
| <br>$\Delta E_{\text{a}} = 56$  | 330i                           | 0.375 ML              |
| <br>$\Delta E_{\text{a}} = 32$  | 248i                           | 0.5 ML                |

**Figure S9.** Schematic representation of the transition states with their respective imaginary frequencies for N<sub>2</sub>O(g) formation at 0, 0.125, 0.25, 0.44 and 0.5 ML  $\theta_{o^*}$ .  $\Delta E_a$  (in kJ mol<sup>-1</sup>) is referenced to the most stable initial configuration. Gray: platinum atom blue: nitrogen atom and red: oxygen atom. Bond distances are in Å.

| TS                                                                                                        | Frequency (cm <sup>-1</sup> ) | $\theta_{o^*}$ |
|-----------------------------------------------------------------------------------------------------------|-------------------------------|----------------|
| 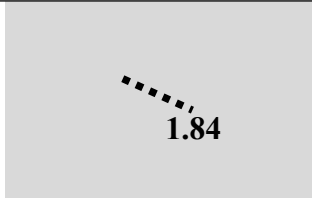<br>$\Delta E_a = 175$   | 273i                          | 0 ML           |
| <br>$\Delta E_a = 175$  | 175i                          | 0.125 ML       |
| <br>$\Delta E_a = 145$ | 166i                          | 0.25 ML        |
| <br>$\Delta E_a = 113$ | 118i                          | 0.44 ML        |
| <br>$\Delta E_a = 105$ | 248i                          | 0.5 ML         |
